# Supplementary material
Source: publisher figshare collection journal article supplement (https://frontiersin.figshare.com/ndownloader/files/30820057)
Supplement: Supplementary file [file 30820057]

## Supplementary files

# Leisure activities, APOE ε4, and cognitive decline: a longitudinal cohort study

Yun Zhang<sup>1,a</sup>, Shihui Fu<sup>2,a</sup>, Ding Ding<sup>3</sup>, Michael W. Lutz<sup>4</sup>, Yi Zeng<sup>5,6,\*</sup> and Yao Yao<sup>5,6,7,\*</sup>

1. School of Sociology and Anthropology, Sun Yat-sen University, Guangzhou, Guangdong 510275, China.
2. Department of Cardiology, Hainan Hospital of Chinese People's Liberation Army General Hospital, Sanya 572000, China.
3. Institute of Neurology, Huashan Hospital, Fudan University, Shanghai, China.
4. Department of Neurology, Duke University School of Medicine, Durham, NC 27710, United States.
5. China Center for Health Development Studies and Center for Healthy Aging and Development Studies, National School of Development, Peking University, Beijing 100871, China.
6. Center for the Study of Aging and Human Development and Geriatrics Division, Medical School of Duke University, Durham, NC 27710, United States.
7. China Center for Health Development Studies, Peking University, Beijing, China.

**Figure S1. Study profile.**

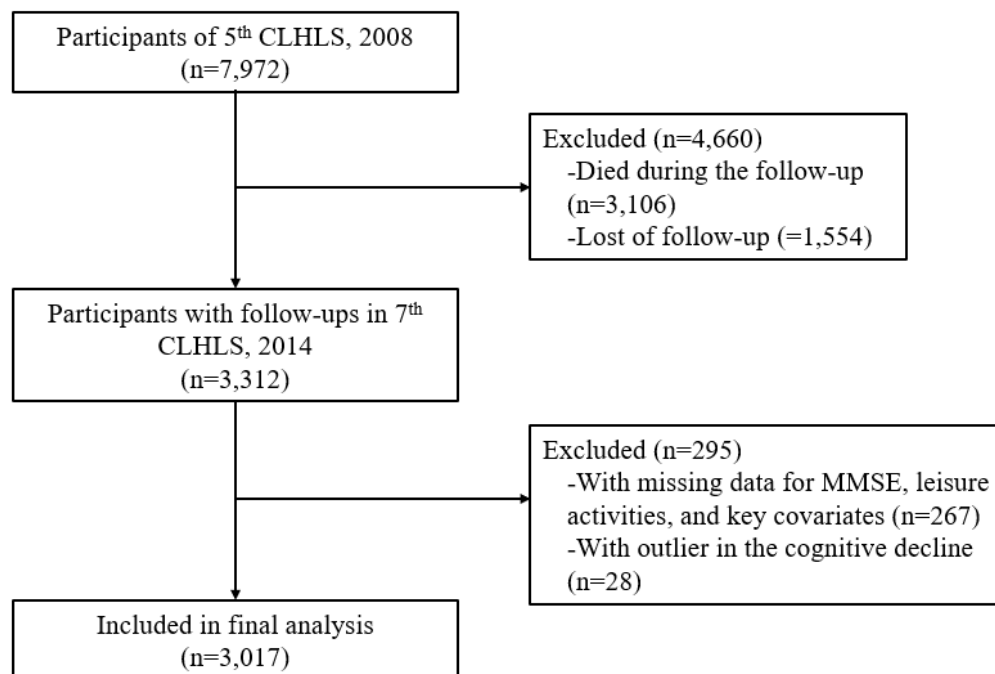

**Figure S2. Three-way interactions of APOE  $\epsilon$ 4, sex, and leisure activities on cognitive decline.**

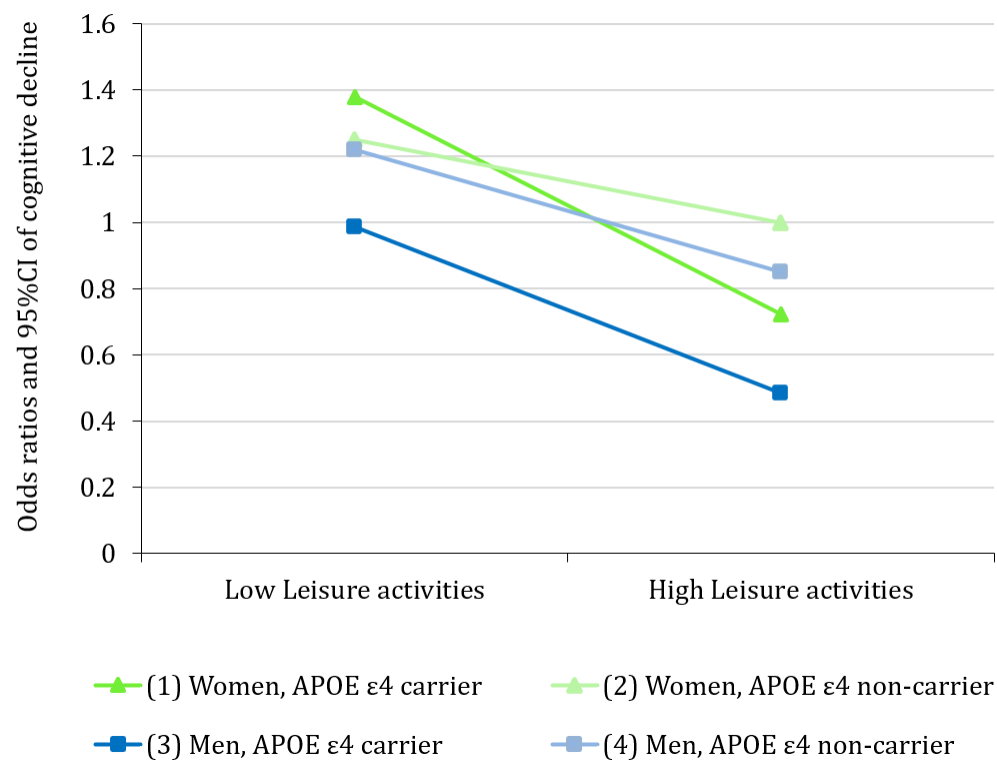

**Table S1. Comparison of baseline characteristics between the included participants 2017 and all participants survey and genotyped in the 2008 wave of CLHLS.**

|                                 | Participants in this<br>study (n=3017) | Participants genotyped in the<br>2008 wave of CLHLS (n=7972) | <i>P</i> |
|---------------------------------|----------------------------------------|--------------------------------------------------------------|----------|
| APOE ε4 allele carrier, %       | 19.49                                  | 19.86                                                        | 0.864    |
| Age, mean, SD                   | 77.0, 9.0                              | 82.6, 11.3                                                   | < 0.001  |
| Gender, %                       |                                        |                                                              | 0.671    |
| Female                          | 49.32                                  | 48.70                                                        |          |
| Male                            | 50.68                                  | 51.30                                                        |          |
| Years of education, mean, SD    | 2.91, 3.69                             | 2.54, 3.70                                                   | 0.294    |
| Occupation before retirement, % |                                        |                                                              | 0.413    |
| White collar                    | 8.32                                   | 10.35                                                        |          |
| Blue collar                     | 83.4                                   | 81.32                                                        |          |
| others                          | 8.29                                   | 8.33                                                         |          |
| Marital status, %               |                                        |                                                              | 0.128    |
| Living with a married spouse    | 44.65                                  | 41.24                                                        |          |
| Have no spouse                  | 55.35                                  | 58.76                                                        |          |
| Socioeconomic status, %         |                                        |                                                              | 0.677    |
| Unfavorable                     | 18.06                                  | 18.87                                                        |          |
| Intermediate                    | 67.62                                  | 67.02                                                        |          |
| Favorable                       | 14.32                                  | 14.11                                                        |          |

**Table S2. Sensitivity analysis of association of APOE  $\epsilon$ 4, Index of leisure activities, and subtypes of leisure activity with cognitive decline, considering depressive symptoms, function of activities of daily living, and population weights as covariates.**

|                                             | Model 4           |          | Model 5           |          |
|---------------------------------------------|-------------------|----------|-------------------|----------|
|                                             | OR                | <i>P</i> | OR                | <i>P</i> |
| APOE $\epsilon$ 4 (Carrier vs. Non-carrier) | 1.25 (1.03, 1.52) | 0.026    | 1.23 (1.02, 1.50) | 0.030    |
| Index of leisure activities                 | 0.93 (0.89, 0.97) | <0.001   | 0.93 (0.90, 0.97) | <0.001   |
| Index of productive activity                | 0.90 (0.85, 0.96) | 0.001    | 0.90 (0.87, 0.97) | 0.004    |
| Index of social activity                    | 0.92 (0.85, 0.99) | 0.039    | 0.91 (0.85, 0.97) | 0.012    |
| Index of physical activity                  | 0.96 (0.91, 1.01) | 0.083    | 0.97 (0.90, 1.05) | 0.117    |

Note: The results derived from the four models were presented as odds ratio with 95% confidential intervals. Model 4 adjusted for gender, age, body mass index, education, occupation before retirement, marital status, smoking, alcohol drinking, diversity of dietary protein intake, hypertension, diabetes, heart disease, and cerebrovascular disease. Model 5 additionally adjusted depressive symptoms, function of activities of daily living, and population weights based on Model 4.

**Table S3. Sensitivity analysis of association of *APOE*  $\epsilon$ 4, Index of leisure activities, and subtypes of leisure activity with cognitive decline, excluding the sample who had moderate or severe cognitive impairment at baseline.**

|                                             | Model 4           |          | Model 5           |          |
|---------------------------------------------|-------------------|----------|-------------------|----------|
|                                             | OR                | <i>P</i> | OR                | <i>P</i> |
| APOE $\epsilon$ 4 (Carrier vs. Non-carrier) | 1.26 (1.03, 1.56) | 0.006    | 1.26 (1.03, 1.52) | 0.014    |
| Index of leisure activities                 | 0.92 (0.89, 0.97) | <0.001   | 0.94 (0.89, 0.98) | 0.008    |
| Index of productive activity                | 0.90 (0.85, 0.96) | <0.001   | 0.90 (0.84, 0.96) | <0.001   |
| Index of social activity                    | 0.91 (0.85, 1.00) | 0.049    | 0.92 (0.85, 0.99) | 0.039    |
| Index of physical activity                  | 0.95 (0.91, 1.04) | 0.104    | 0.96 (0.91, 1.01) | 0.083    |

Note: The results derived from the four models were presented as odds ratio with 95% confidential intervals. Model 4 adjusted for gender, age, body mass index, education, occupation before retirement, marital status, smoking, alcohol drinking, diversity of dietary protein intake, hypertension, diabetes, heart disease, and cerebrovascular disease. Model 5 additionally adjusted depressive symptoms, function of activities of daily living, and population weights based on Model 4.

**Table S4. Sensitivity analysis of association of *APOE*  $\epsilon$ 4, Index of leisure activities, and subtypes of leisure activity with cognitive decline (as continuous variables).**

|                                             | Model 4 |          | Model 5 |          |
|---------------------------------------------|---------|----------|---------|----------|
|                                             | $\beta$ | <i>P</i> | $\beta$ | <i>P</i> |
| APOE $\epsilon$ 4 (Carrier vs. Non-carrier) | -0.726  | 0.007    | -0.786  | 0.014    |
| Index of leisure activities                 | 0.295   | <0.001   | 0.290   | <0.001   |
| Index of productive activity                | 0.395   | <0.001   | 0.382   | <0.001   |
| Index of social activity                    | 0.383   | <0.001   | 0.379   | <0.001   |
| Index of physical activity                  | 0.138   | 0.041    | 0.124   | 0.076    |

Note: The results derived from the four models were presented as odds ratio with 95% confidential intervals. Model 4 adjusted for gender, age, body mass index, education, occupation before retirement, marital status, smoking, alcohol drinking, diversity of dietary protein intake, hypertension, diabetes, heart disease, and cerebrovascular disease. Model 5 additionally adjusted depressive symptoms, function of activities of daily living, and population weights based on Model 4.

**Table S5. Sensitivity analysis of two-way interaction of *APOE*  $\epsilon$ 4, leisure activities, and subtypes of leisure activity on cognitive decline (as continuous variable) between 2008 and 2014.**

|                                                  | Model 1                  | Model 2                  | Model 4                  |
|--------------------------------------------------|--------------------------|--------------------------|--------------------------|
| APOE $\epsilon$ 4                                | -1.08 (-1.92, -0.24) **  | -1.23 (-2.04, -0.41) *** | -1.29 (-2.12, -0.46) *** |
| Leisure activities                               | 1.44 (0.97, 1.91) ***    | 0.54 (0.06, 1.02) **     | 0.49 (-0.02, 0.99) *     |
| APOE $\epsilon$ 4 $\times$ Leisure activities    | 0.96 (-0.10, 2.04) *     | 1.06 (0.01, 2.11) **     | 1.28 (0.21, 2.35) **     |
| APOE $\epsilon$ 4                                | -1.27 (-2.30, -0.24) **  | -1.56 (-2.56, -0.56) *** | -1.57 (-2.58, -0.55) *** |
| Productive activities                            | 1.46 (0.94, 1.98) ***    | 0.44 (-0.09, 0.97)       | 0.38 (-0.17, 0.93)       |
| APOE $\epsilon$ 4 $\times$ Productive activities | 1.01 (-0.18, 2.21) *     | 1.30 (0.13, 2.47) **     | 1.42 (0.23, 2.60) **     |
| APOE $\epsilon$ 4                                | -0.96 (-1.64, -0.28) *** | -1.07 (-1.73, -0.42) *** | -1.04 (-1.71, -0.37) *** |
| Social activities                                | 0.62 (0.14, 1.10) **     | 0.09 (-0.38, 0.56)       | 0.08 (-0.41, 0.58)       |
| APOE $\epsilon$ 4 $\times$ Social activities     | 1.16 (0.08, 2.24) **     | 1.24 (0.15, 2.29) **     | 1.30 (0.23, 2.37) **     |
| APOE $\epsilon$ 4                                | -0.88 (-1.94, 0.19)      | -1.09 (-2.11, -0.05) **  | -0.83 (-1.89, 0.23)      |
| Physical activities                              | 0.07 (-0.46, 0.59)       | -0.23 (-0.75, 0.27)      | -0.25 (-0.77, 0.24)      |
| APOE $\epsilon$ 4 $\times$ Physical activities   | 0.50 (-0.73, 1.73)       | 0.62 (-0.53, 1.84)       | 0.41 (-0.81, 1.63)       |

Note: APOE  $\epsilon$ 4: Carrier vs. non-carrier. Leisure activities:  $\geq 8$  vs.  $\leq 7$  of leisure activities index. Productive activities:  $\geq 3$  vs.  $\leq 2$  of productive activities index. Social activities:  $\geq 1$  vs.  $=0$  of social activities index. Physical activities:  $\geq 3$  vs.  $\leq 2$  of productive activities index.

The results derived from the four models were presented as odds ratio with 95% confidential intervals. Model 1, unadjusted model. Model 2 adjusted for gender age, and body mass index. Model 4 further adjusted for education, occupation before retirement, marital status, smoking, alcohol drinking, diversity of dietary protein intake, hypertension, diabetes, heart disease, and cerebrovascular disease.

\* $P < 0.1$ , \*\* $P < 0.05$ , \*\*\* $P < 0.01$ .
